# Supplementary material for: Optimization of closed-cycle oil recovery: a non-thermal process for bitumen and extra heavy oil recovery
Source: Royal Society of Chemistry journal article supplement (doi:10.1039/d1ra02855c), 2021-01-01
Supplement: d1ra02855c1.pdf [file d1ra02855c1.pdf]

1 **SUPPORTING INFORMATION FOR:** Optimization of Closed–Cycle Oil Recovery: A Non–Thermal Process  
2 for Bitumen and Extra Heavy Oil Recovery

3 Pushpesh Sharma, Konstantinos Kostarelos, and Mohamad Salman  
4

5 **Experimental**

6 The oil sand utilized in this study was acquired from Alberta Innovates Technology Futures, Alberta,  
7 Canada. Bitumen content of oil sand was quantified using the Soxhlet extraction with toluene as a solvent.  
8 The bitumen content was measured to be 12.8 wt.% on average. For characterization, bitumen was  
9 extracted with solvent extraction. The properties of the extracted bitumen are listed in Table SI-1.

**Table SI-1:** Properties of extracted bitumen

| specific gravity | total acid number (mg of KOH/g of oil) | SARA             |                  |               |                    |
|------------------|----------------------------------------|------------------|------------------|---------------|--------------------|
|                  |                                        | saturates (wt.%) | aromatics (wt.%) | resins (wt.%) | asphaltenes (wt.%) |
| 0.977            | 2.94                                   | 23.85            | 28.21            | 15.13         | 32.81              |

10 The bitumen is thixotropic, displaying shear–thinning behavior at the higher shear rates (see Figure SI-1).  
11 In addition, bitumen viscosity decreases drastically with temperature increase. Bitumen viscosity at  $10\text{ s}^{-1}$   
12 shear rate is was measured for temperatures ranging from 10 to  $50^\circ\text{C}$  and exhibit an exponential decline  
13 shown in Figure SI-2. Note that the lower viscosity (573 cP) at the highest measured temperature ( $50^\circ\text{C}$ )  
14 is still considered high with respect to oil recovery and poses microscopic and macroscopic displacement  
15 concerns if relying on a mobilization recovery mechanism. The C–COR approach does not rely on  
16 mobilization for recovery: nonetheless, bitumen viscosity is important with respect to the flow path of  
17 injected fluid and the microemulsion formed *in-situ*.

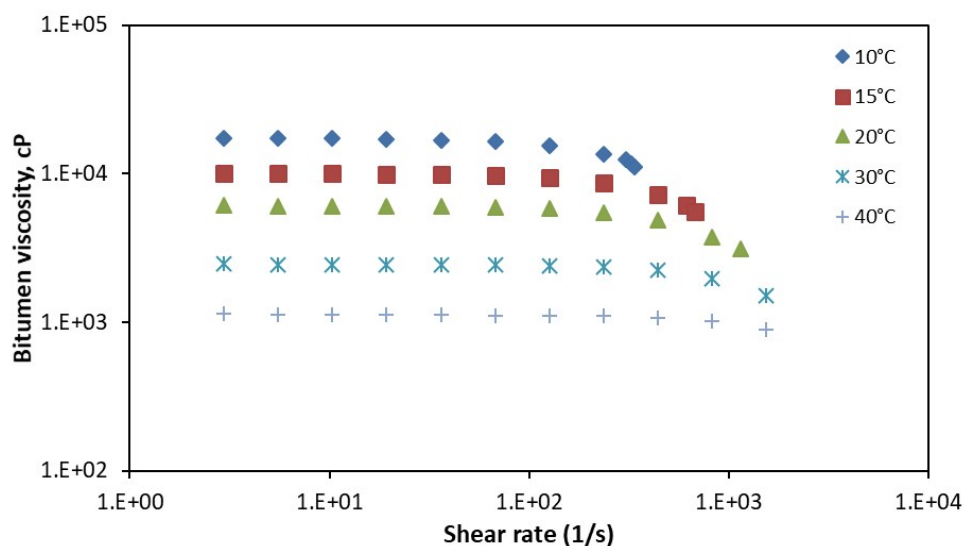

18  
19 **Figure SI-1:** Bitumen viscosity at multiple temperature and shear rates; notice the shear thinning behavior at rates  
20 above  $200\text{ s}^{-1}$ .

21

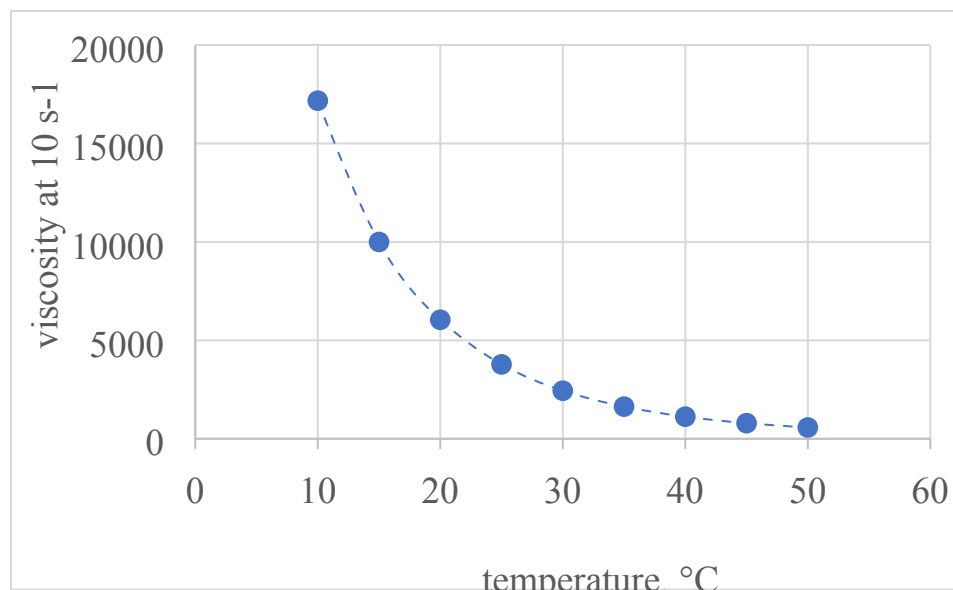

22

23 **Figure SI-2:** Exponential decline in bitumen viscosity measured at 10 s<sup>-1</sup> shear rate as temperature increases.

24

25 The surfactants and co-surfactants used in the study are listed in Table SI-2. The details regarding the  
 26 phase behavior studies to develop the formulation used for the present work are presented in Sharma *et*  
 27 *al.*<sup>1</sup> Table SI-2 represents the selection after exploring over 20 surfactants and combinations of  
 28 surfactants. Other chemicals supplied by various vendors as listed in Table SI-3.

**Table SI-2:** Surfactant types, vendors, and activities

| trade name        | surfactant type          | vendor | activity (%) | MW* (Da) |
|-------------------|--------------------------|--------|--------------|----------|
| Petrostep S13D HA | C13 13 PO alkoxy sulfate | Stepan | 81.2         | 850      |
| Petrostep S3B HA  | C20-24 IOS               | Stepan | 57.9         | 450      |

29 \*Estimated molecular weight.

**Table SI-3:** Laboratory grade chemicals and their vendors

| chemical                                      | vendor        |
|-----------------------------------------------|---------------|
| sodium carbonate                              | VWR           |
| 2-butanol                                     | Alfa Aesar    |
| iso-propyl alcohol                            | Alfa Aesar    |
| tri-ethylene glycol mono butyl ether (TEGMBE) | Alfa Aesar    |
| sodium chloride                               | Sigma Aldrich |
| dichloromethane                               | Alfa Aesar    |
| toluene                                       | Alfa Aesar    |
| hyamine (0.05M) titrant                       | Alfa Aesar    |
| acetonitrile                                  | VWR           |
| ammonium acetate                              | VWR           |
| A-5903 polymer                                | Kemira        |

30 **Sample Analysis:** Gas Chromatograph (GC) and Liquid Chromatograph (HPLC) analyses were used to  
 31 measure oil content and surfactant content, respectively, in samples collected during each column test.

32 The GC or HPLC was calibrated before each column test and analyses were conducted in duplicate,  
33 where measurements that varied greater than 15% were repeated.

#### 34 **Static Tests**

35 **Solubilization tests** were conducted in 20 ml glass tubes. Each tube was filled with 10 g of oil sand sample  
36 and 10 ml of the desired surfactant formulation was added to the tube. Tubes were sealed with aluminum  
37 foil and a plastic cap. Tubes were mixed gently and then allowed to equilibrate for 24 hours. After  
38 equilibration, the supernatant was collected and analyzed by GC/MS (Table SI-4). The formulation used  
39 for the adsorption tests was the basis for these tests: the formulation was varied with respect to the blend  
40 ratio of the two surfactants (IOS and sulfate), and two alternative co-solvents isopropyl alcohol and  
41 TEGMBE were studied as well. Sodium carbonate concentration was maintained at 4 wt.%. A control  
42 containing oil sand and only sodium carbonate was conducted and resulted in no oil solubilization.

**Table SI-4:** GC method for bitumen concentration measurement in micromulsion

---

|                   |                                                                                           |
|-------------------|-------------------------------------------------------------------------------------------|
| inlet temperature | 250°C                                                                                     |
| column            | He constant flow 1 ml/min                                                                 |
| oven program      | initial temperature 80°C for 1 min; ramp of 5°C per min to 275°C;<br>hold up time 40 mins |
| front detector    | 300°C; hydrogen 30ml/min, air 350 ml/min                                                  |
| MS Quad           | 150°C                                                                                     |
| MS Source         | 230°C                                                                                     |

---

43

44 HPLC methods used for surfactant analysis are unique to the surfactant type; the primary method utilized  
45 in this study is described in Table SI5.

**Table SI-5:** HPLC method for surfactant detection

---

|                    |                                         |
|--------------------|-----------------------------------------|
| injector           | 0.2 µL                                  |
| solvent a          | acetonitrile                            |
| solvent b          | ammonium acetate 0.1 M                  |
| pump               | 1 ml/min                                |
| solvent ratio      | initial: 1:1<br>15 min: 9:1<br>end: 9:1 |
| column temperature | 40°C                                    |
| <i>ELSD:</i>       |                                         |
| evaporator         | 60°C                                    |
| nebulizer          | 60°C                                    |
| gas flow rate      | 1.6 SLM                                 |

---

46

47 **Dynamic Tests (Flow experiments)**

48 A photograph of the experimental setup and a flow diagram for the dynamic tests are shown in Figures  
49 SI-3 and SI-4, respectively. The setup employed an HPLC pump to deliver fluids at a constant rate or  
50 constant pressure. For all the column tests, the experiments were conducted using the same materials  
51 and procedures in order to provide comparable results. Multiple floating piston accumulators were  
52 prepared for various liquids (brine, surfactant formulations, etc.). The oil sand was packed into a Kimble  
53 Kontes Chromoflex glass column, 15 cm in length and 2.5 cm in diameter. A water circulator (ISOTEMP  
54 6200) was used to maintain the required flow temperature. Omega PX-26 pressure transducers were  
55 used to measure pressure drop across the inlet and outlet. A vacuum pump was used to pull vacuum  
56 during measurements of the *bulk water fraction* ( $W_f$ ). The bulk water fraction of the sand pack denotes  
57 the available pore volume for flow (Equation 1) and was measured in a similar manner as porosity for  
58 consolidated cores.

59 
$$W_f = \frac{\text{Pore Volume, } PV - \text{Oil Volume, } V_{oil}}{\text{Total Volume, } V_{total}} \#1$$

60

61 Bulk water fraction is analogous to water saturation in the case of consolidated cores and monitoring the  
62  $W_f$  provides a means of quantifying the oil recovery. Keeping in mind that oil sands are an unconsolidated  
63 media, the  $W_f$  increases as oil is recovered during the experiment. It is also important to keep in mind  
64 that the porosity is not known at the start of the flow experiments and, thus, bitumen content is not  
65 reported in terms of *saturation* but in terms of *mass content*. Thus, oil recovery can be assessed  
66 gravimetrically and using  $W_f$ , and both were used for confirmation of oil recovery for each column test.

67 Dynamic tests sand packs were prepared using Athabasca oil sand in the glass columns. The flow rate was  
68 maintained at 0.013 ml/min (0.27 m/day), vertically upwards, for each test except in Dynamic Test 4  
69 where the rate was doubled. Experimental conditions are listed in Table SI-6. Microemulsion produced  
70 from these tests were collected in 12-ml glass tubes using a fraction collector.

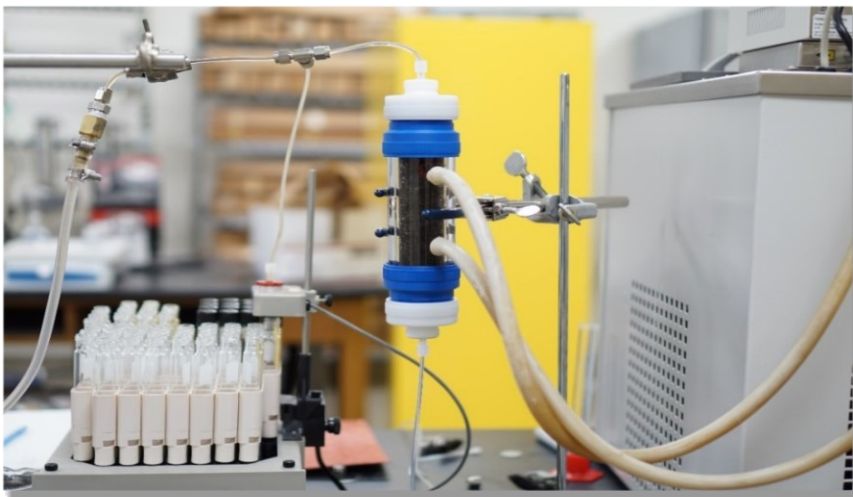

71

72 **Figure SI-3:** Experimental setup for dynamic tests where a jacketed column controlled the process  
73 temperature.

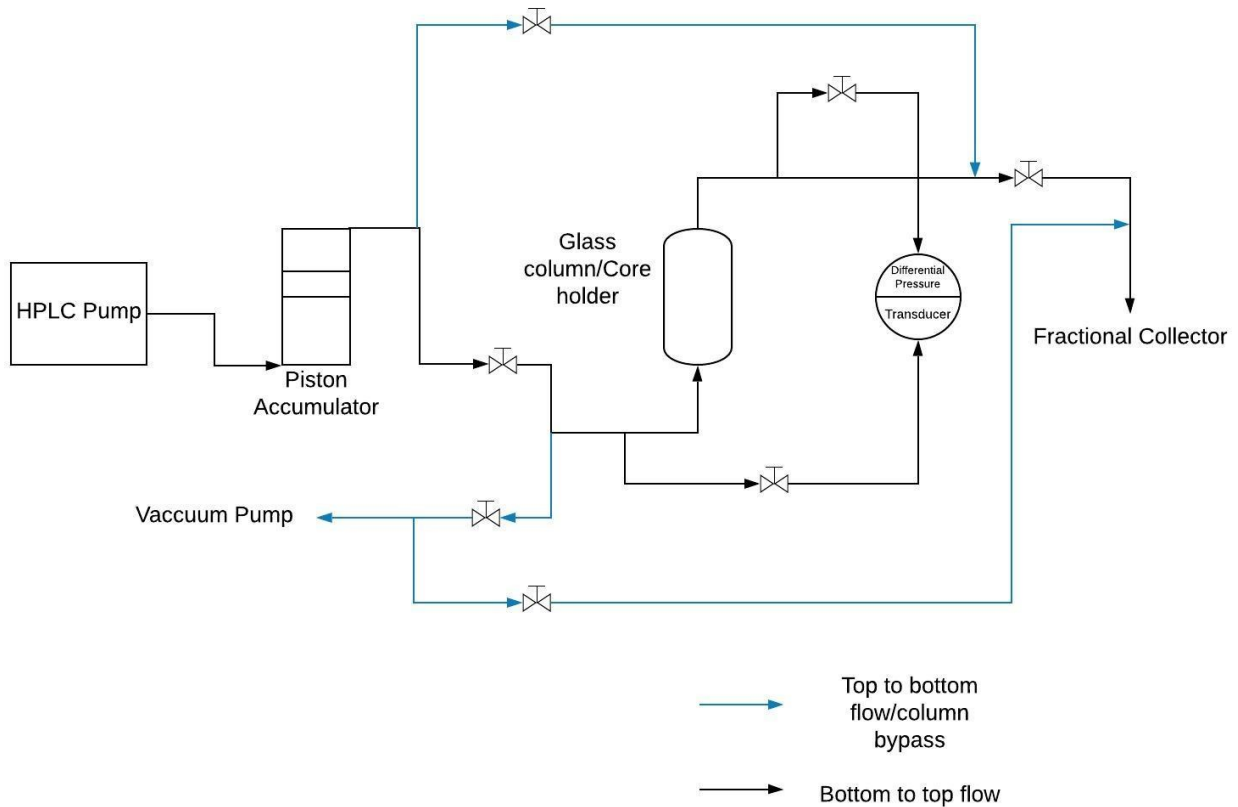

74

75 **Figure SI-4:** Flow diagram for the dynamic tests; blue-colored arrows highlight the bypass loop

**Table SI-6:** Dynamic test experimental conditions

| test number | description          | approach               | temperature (°C) |
|-------------|----------------------|------------------------|------------------|
| 1           | baseline             | continuous injection   | 20               |
| 2           | elevated temperature | continuous injection   | 40               |
| 3           | soaking              | intermittent injection | 20               |
| 4           | high rate            | continuous injection   | 20               |
| 5           | polymer              | continuous injection   | 20               |

76

77 Dynamic Test 1 was conducted at 20°C with the surfactant formulation based on static tests and treated  
 78 as a baseline for optimization. Test 2 was performed with the same formulation but with thermal  
 79 enhancement at 40°C and injection was stopped at 10,000 ppm bitumen concentration as noted above.  
 80 Test 3 was conducted with a “soaking” injection scheme: one PV of the surfactant formulation was  
 81 injected and the column was isolated for 13 hours (the same duration as the injection). This scheme was  
 82 repeated until outlet concentration dropped below the stopping criteria of 10,000 ppm. Test 4 was  
 83 designed to study the effect of flow rate on oil recovery and was conducted at the same conditions as the  
 84 baseline (DT 1) but with a faster injection rate. As in the previous flow experiments and, for better  
 85 comparison, the injection was stopped when outlet concentration fell below 10,000 ppm.

86 For Dynamic Test 5, the surfactant formulation was modified by adding 2000 ppm of A-5903 polymer  
 87 solution. The stopping criterion of 10,000 ppm outlet concentration was not followed in this case because,  
 88 in the presence of polymer, the GC method was not capable to properly compare the bitumen  
 89 concentration level to stopping criteria and the test was continued longer than was likely needed.

90 After each dynamic test, a 1 wt.% NaCl solution was injected into the sand pack to remove all the  
 91 remaining microemulsion remaining in the system. The bulk water fraction was re-measured after each  
 92 test. The bulk water fraction change was used to calculate the mass of bitumen recovered and report the  
 93 recovery of bitumen Equations 2 and 3).

94 
$$\Delta PV = W_{f,final}V_{total} - W_{f,initial}V_{total} \#2$$

95

96 
$$\%Recovery = \frac{(\Delta PV)\rho_{bitumen}}{bitumen\ weight} \times 100 \#3$$

97 where  $W_{f,initial}$  is bulk water fraction before the test,  $W_{f,final}$  is bulk water fraction after the test,  $V_{total}$  is the  
 98 total volume of the column,  $\Delta PV$  is the change in pore volume due to bitumen recovery,  $\rho_{bitumen}$  is the  
 99 density of bitumen.

100 **Results and Discussion**

101 *Dynamic Tests*

102 The properties of each sand pack measured prior to each dynamic test are listed in Table SI7. The sand  
 103 pack mass includes the oil sand only, as received from the field. The mass of bitumen is calculated from  
 104 the sand pack weight based on the average oil content measured of 12.8 wt.%. Note that the pore volume  
 105 and permeability reported here are the initial values measured on the sand pack, where some of the pore  
 106 space is occupied by immovable oil (bitumen) and these values will increase as oil is recovered.

Table SI-7: Sand pack properties measured prior to all dynamic tests

| test | sand pack mass<br>(g) | bitumen<br>(g) | $W_f$          | pore volume     | permeability                   | temperature (°C) |
|------|-----------------------|----------------|----------------|-----------------|--------------------------------|------------------|
|      |                       |                | initial<br>(%) | initial<br>(ml) | initial<br>( $\mu\text{m}^2$ ) |                  |
| 1    | 132.07                | 16.90          | 13.8           | 10.2            | 10                             | 20               |
| 2    | 137.70                | 17.63          | 13.8           | 10.2            | 44                             | 40               |
| 3    | 138.22                | 17.69          | 12.6           | 9.2             | 38                             | 20               |
| 4    | 138.48                | 17.72          | 14.4           | 10.6            | 44                             | 20               |
| 5    | 147.31                | 18.85          | 14.1           | 10.4            | 10                             | 20               |

107

108 **Dynamic Test 1.** Figure SI-5 highlights the difference between sand samples at the outlet and inlet  
 109 collected after terminating the experiment and emptying the sand from the column. It is clear that oil was  
 110 recovered from the sand comparing photographs of the original oil sand to the photographs taken after  
 111 the test was ended. Close examination of sand after the test also led to the conclusion that oil recovery  
 112 at the inlet is better than the outlet.

113

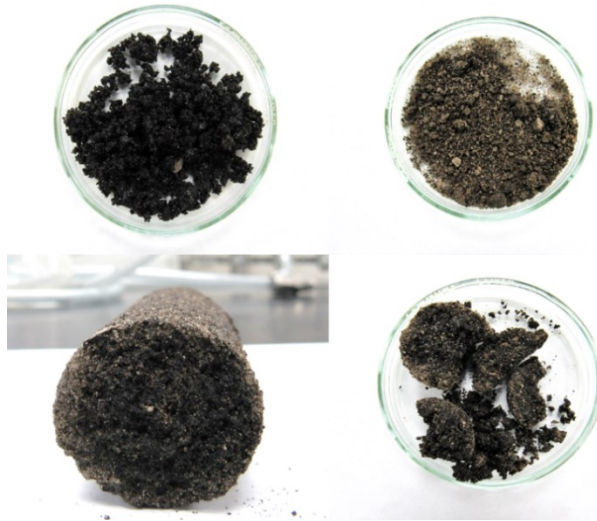

114

115 **Figure SI-5:**Dynamic Test 1 sand pack. Top left – original oil sand sample; top right – inlet sand sample  
 116 after test; bottom left – end view of outlet sand sample after test; bottom right – outlet sand sample after  
 117 the test.

118 **Dynamic Test 5.** The final test was conducted using a viscosifier to improve the macroscopic sweep  
 119 efficiency or conformance. The surfactant formulation viscosity was 2.2 cP at 20°C without polymer.  
 120 Surfactant formulations were prepared with a range of polymer concentrations and the viscosities  
 121 measured at 20, 40, and 60°C, over a range of shear rates. The results of viscosity at 20°C and 1 sec<sup>-1</sup> shear  
 122 rate are listed in Table SI8.

**Table SI-8:** Polymer solution viscosity over a range of concentrations (20°C, 1 sec<sup>-1</sup> shear rate)

| polymer concentration (ppm) | viscosity (cP) |
|-----------------------------|----------------|
| 0                           | 2.2            |
| 2000                        | 18.8           |
| 4000                        | 85.6           |
| 6000                        | 238.2          |
| 10000                       | 832.0          |

123

124 **References for Supplemental Information**

125 1. Sharma, P.; Kostarelos, K.; Lenschow, S.; Christensen, A.; de Blanc, P. C., Surfactant flooding makes a  
 126 comeback: Results of a full-scale, field implementation to recover mobilized NAPL. *Journal of Contaminant*  
 127 *Hydrology* **2020**, 230.

128
